# Supplementary material for: Land Use Scenario Simulation and Ecosystem Service Management for Different Regional Development Models of the Beibu Gulf Area, China
Source: MDPI journal article supplement (doi:10.3390/rs13163161), 2021-08-10
Supplement: s1 [file s1]

Archive with 1 entries (1 files):
- remotesensing-1302931-supplementary.pdf
